# Supplementary material for: Accurate structures from combined gas electron diffraction and liquid crystal NMR data; the importance of anisotropy of indirect couplings for 1,4-difluorobenzene
Source: Royal Society of Chemistry journal article supplement (doi:10.1039/b708842f), 2007-10-22

**Accurate structures from combined gas electron diffraction and liquid crystal NMR data; the importance of anisotropy of indirect couplings for 1,4-difluorobenzene**

Ewan M. Brown, Philip D. McCaffrey, Derek A. Wann and David W. H. Rankin\*

**Electronic supplementary information**

**Table S1** Nozzle-to-plate distances, weighting functions, scale factors, correlation parameters and electron wavelengths used in the joint electron-diffraction and LCNMR study of 1,4-difluorobenzene.

|                                   |          |          |
|-----------------------------------|----------|----------|
| Nozzle-to-camera distance / mm    | 285.96   | 128.22   |
| $\Delta s / \text{nm}^{-1}$       | 2        | 4        |
| $s_{\text{min}} / \text{nm}^{-1}$ | 20       | 60       |
| $s_{\text{w1}} / \text{nm}^{-1}$  | 40       | 80       |
| $s_{\text{w2}} / \text{nm}^{-1}$  | 124      | 308      |
| $s_{\text{max}} / \text{nm}^{-1}$ | 144      | 320      |
| Correlation parameter, $q$        | 0.476    | 0.140    |
| Scale factor                      | 0.725(3) | 0.724(8) |
| Wavelength / pm                   | 5.749    | 5.749    |

**Table S2** Dipolar coupling constants / Hz. See text for a more detailed description of the values.

| Constant                  | Observed | Corrected | Calculated | Uncertainty | Difference |
|---------------------------|----------|-----------|------------|-------------|------------|
| ZLI 1167                  |          |           |            |             |            |
| $D_{1,8}$                 | 87.48    | 89.61     | 89.46      | 0.22        | 0.15       |
| $D_{2,8}$                 | 766.30   | 827.17    | 826.10     | 6.20        | 1.07       |
| $D_{7,8}$                 | 228.58   | 231.26    | 231.48     | 0.27        | -0.22      |
| $D_{1,9}$                 | 31.81    | 32.10     | 31.96      | 0.10        | 0.14       |
| $D_{2,9}$                 | 132.81   | 135.82    | 135.76     | 0.30        | 0.06       |
| $D_{8,9}$                 | 363.61   | 369.14    | 369.46     | 0.55        | -0.32      |
| $D_{8,10}$                | 54.73    | 54.99     | 54.98      | 0.10        | 0.01       |
| $D_{2,11}$                | 17.75    | 17.84     | 17.61      | 0.20        | 0.23       |
| $D_{8,11}$                | 33.47    | 33.65     | 33.60      | 0.10        | 0.05       |
| $D_{2,12}$                | 22.40    | 22.57     | 22.70      | 0.20        | -0.13      |
| $D_{8,12}$                | 44.21    | 44.56     | 44.55      | 0.10        | 0.01       |
| $D_{7,10}$                | 33.87    | 33.85     | 33.78      | 0.10        | 0.07       |
| $D_{1,10}$                | 21.31    | 21.26     | 20.99      | 0.10        | 0.27       |
| $D_{1,7}$                 | 554.68   | 566.01    | 566.28     | 1.30        | -0.27      |
| $D_{2,10}$                | 27.45    | 27.45     | 27.28      | 0.10        | 0.17       |
| $D_{2,7}$                 | 95.35    | 95.90     | 96.03      | 0.10        | -0.13      |
| ZLI 1132 ( $^1\text{H}$ ) |          |           |            |             |            |
| $D_{1,8}$                 | -185.73  | -190.38   | -190.01    | 0.60        | -0.37      |
| $D_{2,8}$                 | -1689.53 | -1826.80  | -1822.72   | 13.80       | -4.08      |
| $D_{7,8}$                 | -506.69  | -512.75   | -513.37    | 0.60        | 0.62       |
| $D_{1,9}$                 | -72.38   | -73.05    | -72.81     | 0.30        | -0.24      |
| $D_{2,9}$                 | -307.00  | -313.96   | -314.14    | 0.80        | 0.18       |
| $D_{8,9}$                 | -850.37  | -863.06   | -864.16    | 1.30        | 1.10       |
| $D_{8,10}$                | -126.26  | -126.86   | -126.85    | 0.10        | -0.01      |
| $D_{2,11}$                | -38.47   | -38.67    | -38.77     | 0.30        | 0.10       |
| $D_{8,11}$                | -73.71   | -74.11    | -74.01     | 0.10        | -0.10      |
| $D_{2,12}$                | -47.98   | -48.36    | -48.42     | 0.36        | 0.06       |
| $D_{8,12}$                | -93.80   | -94.57    | -94.59     | 0.10        | 0.02       |
| $D_{7,10}$                | -79.14   | -79.09    | -79.02     | 0.10        | -0.07      |
| ZLI 1695 ( $^1\text{H}$ ) |          |           |            |             |            |
| $D_{1,8}$                 | 115.33   | 118.09    | 118.10     | 0.37        | -0.01      |
| $D_{2,8}$                 | 987.32   | 1066.68   | 1063.07    | 7.90        | 3.61       |
| $D_{7,8}$                 | 293.16   | 296.54    | 296.82     | 0.34        | -0.28      |
| $D_{1,9}$                 | 40.15    | 40.52     | 40.20      | 0.20        | 0.32       |
| $D_{2,9}$                 | 165.06   | 168.80    | 168.80     | 0.40        | 0.00       |
| $D_{8,9}$                 | 448.28   | 455.19    | 455.64     | 0.68        | -0.45      |
| $D_{8,10}$                | 68.22    | 68.55     | 68.50      | 0.10        | 0.05       |
| $D_{2,11}$                | 22.65    | 22.76     | 22.69      | 0.28        | 0.07       |
| $D_{8,11}$                | 43.12    | 43.35     | 43.28      | 0.10        | 0.07       |
| $D_{2,12}$                | 29.84    | 30.07     | 29.89      | 0.28        | 0.18       |
| $D_{8,12}$                | 58.37    | 58.83     | 58.84      | 0.10        | -0.01      |
| $D_{7,10}$                | 41.72    | 41.69     | 41.67      | 0.10        | 0.03       |
| Mixture                   |          |           |            |             |            |
| $D_{1,8}$                 | -114.31  | -118.32   | -118.16    | 0.50        | -0.16      |
| $D_{2,8}$                 | -1573.47 | -1708.79  | -1705.37   | 13.60       | -3.42      |
| $D_{7,8}$                 | -493.35  | -500.35   | -501.61    | 0.70        | 1.26       |
| $D_{1,9}$                 | -86.20   | -87.02    | -86.68     | 0.40        | -0.34      |
| $D_{2,9}$                 | -403.21  | -412.35   | -411.88    | 1.00        | -0.47      |
| $D_{8,9}$                 | -1190.30 | -1206.21  | -1204.36   | 1.60        | -1.85      |
| $D_{8,10}$                | -162.94  | -163.72   | -163.57    | 0.10        | -0.15      |
| $D_{2,11}$                | -35.36   | -35.55    | -35.64     | 0.60        | 0.09       |

Electronic Supplementary Material for PCCP  
This journal is © The Owner Societies 2007

|                              |          |          |          |      |       |
|------------------------------|----------|----------|----------|------|-------|
| $D_{8,11}$                   | -67.91   | -68.29   | -68.31   | 0.10 | 0.02  |
| $D_{2,12}$                   | -31.67   | -31.96   | -31.80   | 0.60 | -0.16 |
| $D_{8,12}$                   | -57.89   | -58.51   | -58.47   | 0.10 | -0.04 |
| $D_{7,10}$                   | -110.13  | -110.06  | -110.13  | 0.10 | 0.07  |
| $D_{1,10}$                   | -65.36   | -66.55   | -68.41   | 0.35 | 1.86  |
| $D_{1,7}$                    | -1777.12 | -1848.74 | -1845.94 | 5.00 | -2.81 |
| $D_{2,10}$                   | -84.59   | -84.59   | -85.21   | 0.20 | -0.62 |
| $D_{2,7}$                    | -272.98  | -280.02  | -279.95  | 0.30 | -0.07 |
| ZLI 1132 ( $^{19}\text{F}$ ) |          |          |          |      |       |
| $D_{7,8}$                    | -450.81  | -456.20  | -456.13  | 0.60 | -0.07 |
| $D_{8,9}$                    | -762.53  | -773.91  | -774.86  | 1.20 | 0.94  |
| $D_{8,10}$                   | -112.90  | -113.44  | -113.48  | 0.10 | 0.04  |
| $D_{8,11}$                   | -65.31   | -65.67   | -65.68   | 0.13 | 0.01  |
| $D_{8,12}$                   | -82.64   | -83.32   | -83.38   | 0.22 | 0.06  |
| $D_{7,10}$                   | -70.87   | -70.83   | -70.85   | 0.10 | 0.02  |
| $D_{1,10}$                   | -44.06   | -44.10   | -44.01   | 0.27 | -0.09 |
| $D_{1,7}$                    | -1160.49 | -1187.89 | -1187.63 | 2.80 | -0.26 |
| $D_{2,10}$                   | -57.17   | -57.35   | -56.78   | 0.30 | -0.57 |
| $D_{2,7}$                    | -195.97  | -197.72  | -197.56  | 0.20 | -0.16 |
| ZLI 1695 ( $^{19}\text{F}$ ) |          |          |          |      |       |
| $D_{7,8}$                    | 264.87   | 267.92   | 268.11   | 0.31 | -0.19 |
| $D_{8,9}$                    | 408.31   | 414.60   | 415.29   | 0.64 | -0.69 |
| $D_{8,10}$                   | 61.98    | 62.28    | 62.29    | 0.11 | -0.01 |
| $D_{8,11}$                   | 38.87    | 39.08    | 39.06    | 0.11 | 0.02  |
| $D_{8,12}$                   | 52.43    | 52.84    | 52.80    | 0.11 | 0.04  |
| $D_{7,10}$                   | 38.01    | 37.99    | 37.97    | 0.10 | 0.02  |
| $D_{1,10}$                   | 23.73    | 23.76    | 23.59    | 0.10 | 0.17  |
| $D_{1,7}$                    | 621.10   | 635.97   | 636.52   | 1.50 | -0.55 |
| $D_{2,10}$                   | 30.83    | 30.93    | 30.78    | 0.10 | 0.15  |
| $D_{2,7}$                    | 108.02   | 109.00   | 108.98   | 0.11 | 0.02  |

---

**Table S3** Interatomic distances ( $r_a$ /pm), refined and calculated (MM3) amplitudes of vibration ( $u$ /pm) and perpendicular distance corrections ( $k$ /pm) from the combined electron diffraction and LCNMR refinement of 1,4-difluorobenzene.<sup>a</sup>

|          | Atom pair  | $r_a$    | $u$ (exp.)              | $k$ | $u$ (calc.) |
|----------|------------|----------|-------------------------|-----|-------------|
| $u_4$    | C(2)–H(8)  | 109.2(2) | 7.0(7)                  | 1.7 | 7.7         |
| $u_3$    | C(1)–F(7)  | 134.7(2) | 4.4(tied to $u_1$ )     | 0.6 | 4.4         |
| $u_1$    | C(1)–C(2)  | 139.0(1) | 4.5(1)                  | 0.3 | 4.5         |
| $u_2$    | C(2)–C(3)  | 139.6(2) | 4.5(tied to $u_1$ )     | 0.4 | 4.5         |
| $u_7$    | C(1)⋯H(8)  | 214.6(2) | 9.4(tied to $u_{12}$ )  | 1.0 | 9.8         |
| $u_{13}$ | C(2)⋯H(9)  | 216.8(1) | 9.4(tied to $u_{12}$ )  | 1.0 | 9.8         |
| $u_{12}$ | C(2)⋯F(7)  | 235.4(1) | 5.9(2)                  | 0.4 | 6.1         |
| $u_5$    | C(1)⋯C(3)  | 239.6(2) | 5.3(tied to $u_{12}$ )  | 0.2 | 5.6         |
| $u_{11}$ | C(2)⋯C(6)  | 243.1(2) | 5.4(tied to $u_{12}$ )  | 0.2 | 5.6         |
| $u_{20}$ | H(8)⋯H(9)  | 252.1(1) | 15.5(fixed)             | 1.3 | 15.5        |
| $u_{17}$ | F(7)⋯H(8)  | 258.6(1) | 12.5(tied to $u_{12}$ ) | 0.9 | 13.0        |
| $u_6$    | C(1)⋯C(4)  | 273.4(4) | 7.2(tied to $u_{10}$ )  | 0.2 | 6.0         |
| $u_{10}$ | C(2)⋯C(5)  | 280.1(2) | 7.5(5)                  | 0.1 | 6.2         |
| $u_8$    | C(1)⋯H(9)  | 338.9(2) | 9.6(12)                 | 0.7 | 9.6         |
| $u_{16}$ | C(2)⋯H(12) | 340.2(2) | 9.7(tied to $u_8$ )     | 0.6 | 9.6         |
| $u_{14}$ | C(2)⋯F(10) | 361.9(1) | 6.6(3)                  | 0.2 | 6.3         |
| $u_{15}$ | C(2)⋯H(11) | 388.4(2) | 7.2(24)                 | 0.5 | 9.5         |
| $u_9$    | C(1)⋯F(10) | 407.8(2) | 6.8(6)                  | 0.1 | 6.4         |
| $u_{22}$ | H(8)⋯H(12) | 427.8(3) | 13.1(fixed)             | 0.8 | 13.1        |
| $u_{18}$ | F(7)⋯H(9)  | 451.1(2) | 9.0(17)                 | 0.5 | 10.8        |
| $u_{21}$ | H(8)⋯H(11) | 496.4(3) | 11.9(fixed)             | 0.7 | 11.9        |
| $u_{19}$ | F(7)⋯F(10) | 542.0(3) | 7.6(9)                  | 0.0 | 6.8         |

<sup>a</sup> Values in parentheses are the uncertainties on the last digits.



**Table S5** Cartesian coordinates in Å for the final refined structure ( $r_{\text{h0}}$ ) of 1,4-difluorobenzene.

|       | $x$     | $y$     | $z$    |
|-------|---------|---------|--------|
| C(1)  | -1.3671 | 0.0000  | 0.0000 |
| C(2)  | -0.6968 | 1.2150  | 0.0000 |
| C(3)  | 0.6968  | 1.2150  | 0.0000 |
| C(4)  | 1.3671  | 0.0000  | 0.0000 |
| C(5)  | 0.6968  | -1.2150 | 0.0000 |
| C(6)  | -0.6968 | -1.2150 | 0.0000 |
| F(7)  | -2.7103 | 0.0000  | 0.0000 |
| H(8)  | -1.2585 | 2.1368  | 0.0000 |
| H(9)  | 1.2585  | 2.1368  | 0.0000 |
| F(10) | 2.7103  | 0.0000  | 0.0000 |
| H(11) | 1.2585  | -2.1368 | 0.0000 |
| H(12) | -1.2585 | -2.1368 | 0.0000 |

**Figure S1** Experimental and difference (experimental minus theoretical) molecular-scattering intensity curves for 1,4-difluorobenzene.

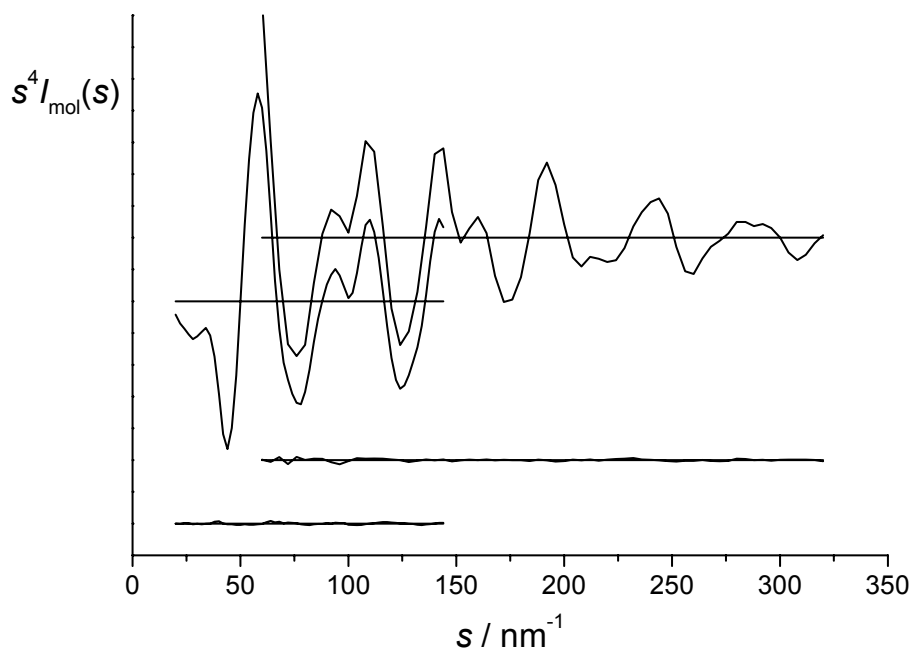

Supplement: b708842f.pdf [file b708842f.pdf]
